# Supplementary material for: Effects of Sex on Early Outcome following Repair of Acute Type A Aortic Dissection: Results from The Nordic Consortium for Acute Type A Aortic Dissection (NORCAAD)
Source: PubMed Central journal article supplement (PMC6645907; doi:10.1055/s-0039-1687900), 2019-07-22
Supplement: 10-1055-s-0039-1687900-s180046.pdf [file 10-1055-s-0039-1687900-s180046.pdf]

**Supplementary Table S1** Event rates with 95% CI obtained from Poisson regression for death from surgery and from discharge by sex and age group

| Endpoint               | Age group    | Men        |                                             | Women      |                                            |
|------------------------|--------------|------------|---------------------------------------------|------------|--------------------------------------------|
|                        |              | n (%)      | Event rate (95% CI)<br>per 100 person-years | n (%)      | Event rate(95% CI)<br>per 100 person-years |
| Death (from surgery)   | All patients | 220 (28.2) | 8.97 (7.86–10.24)                           | 111 (29.8) | 10.08 (8.36–12.15)                         |
|                        | ≤ 70 y       | 150 (24.0) | 7.32 (6.24–8.59)                            | 64 (26.8)  | 8.41 (6.57–10.77)                          |
|                        | > 70 y       | 70 (44.6)  | 17.37 (13.74–21.96)                         | 47 (35.1)  | 13.74 (10.32–18.29)                        |
| Death (from discharge) | All patients | 90 (14.0)  | 3.75 (3.05–4.61)                            | 49 (16.0)  | 4.62 (3.50–6.12)                           |
|                        | ≤ 70 y       | 56 (10.7)  | 2.80 (2.15–3.64)                            | 25 (12.6)  | 3.43 (2.32–5.08)                           |
|                        | > 70 y       | 34 (28.1)  | 8.56 (6.11–11.97)                           | 24 (22.2)  | 7.26 (4.86–10.82)                          |

Abbreviations: CI, confidence interval; IRR, incidence rate ratio.

Note: Event rates per 100 person-years and IRRs are obtained from Poisson regression.

**Supplementary Table S2** Age-adjusted Cox proportional hazard models for prediction of time to death from discharge

| Predictor                                     | Value                    | Missing data | Events n (%) | Hazard ratio (95% CI) | p-Value  | p-Value for assumption of pH |
|-----------------------------------------------|--------------------------|--------------|--------------|-----------------------|----------|------------------------------|
| Gender                                        | Male                     | 0            | 90 (14.0)    |                       |          | 0.38                         |
|                                               | Female                   |              | 49 (16.0)    | 0.94 (0.66–1.34)      | 0.72     |                              |
| Gender (multivariable-adjusted <sup>a</sup> ) | Male                     | 26           | 87 (13.9)    |                       |          | 0.38                         |
|                                               | Female                   |              | 49 (16.5)    | 1.00 (0.70–1.44)      | 0.98     |                              |
| Age (y)                                       | Risk by 5-unit increase  | 0            | 139 (14.6)   | 1.35 (1.24–1.47)      | < 0.0001 | 0.70                         |
| Age above 70 y                                | No                       | 0            | 81 (11.2)    |                       |          | 0.47                         |
|                                               | Yes                      |              | 58 (25.3)    | 2.63 (1.87–3.68)      | < 0.0001 |                              |
| Hypertension                                  | No                       | 1            | 68 (14.4)    |                       |          | 0.13                         |
|                                               | Yes                      |              | 71 (14.8)    | 1.02 (0.73–1.43)      | 0.89     |                              |
| Hypercholesterolemia                          | No                       | 3            | 124 (14.7)   |                       |          | 0.13                         |
|                                               | Yes                      |              | 15 (14.3)    | 0.80 (0.47–1.37)      | 0.42     |                              |
| Diabetes                                      | No                       | 4            | 137 (14.7)   |                       |          | 0.55                         |
|                                               | Yes                      |              | 2 (12.5)     | 0.75 (0.19–3.04)      | 0.69     |                              |
| COPD                                          | No                       | 2            | 125 (13.8)   |                       |          | 0.84                         |
|                                               | Yes                      |              | 14 (30.4)    | 1.72 (0.99–3.00)      | 0.054    |                              |
| HxStroke                                      | No                       | 2            | 131 (14.4)   |                       |          | 0.57                         |
|                                               | Yes                      |              | 8 (21.6)     | 1.30 (0.63–2.66)      | 0.47     |                              |
| HxTIA                                         | No                       | 2            | 138 (14.8)   |                       |          | 0.36                         |
|                                               | Yes                      |              | 1 (7.1)      | 0.57 (0.08–4.11)      | 0.58     |                              |
| HxCKD                                         | No                       | 2            | 132 (14.2)   |                       |          | 0.83                         |
|                                               | Yes                      |              | 7 (41.2)     | 2.94 (1.37–6.29)      | 0.0055   |                              |
| Marfan syndrome                               | No                       | 2            | 136 (15.0)   |                       |          | 0.27                         |
|                                               | Yes                      |              | 3 (7.5)      | 0.60 (0.19–1.91)      | 0.39     |                              |
| Cardiac arrest                                | No                       | 2            | 133 (14.6)   |                       |          | 0.29                         |
|                                               | Yes                      |              | 6 (17.1)     | 1.13 (0.50–2.56)      | 0.77     |                              |
| Hypotensive shock at presentation             | No                       | 72           | 98 (14.1)    |                       |          | 0.041                        |
|                                               | Yes                      |              | 29 (15.7)    | 0.97 (0.64–1.48)      | 0.90     |                              |
| Pericardial tamponade                         | No                       | 22           | 103 (13.1)   |                       |          | 0.052                        |
|                                               | Yes                      |              | 33 (23.4)    | 1.51 (1.02–2.24)      | 0.042    |                              |
| DeBakey class                                 | I                        | 2            | 109 (15.7)   |                       |          | 0.080                        |
|                                               | II                       |              | 30 (11.8)    | 0.66 (0.44–1.00)      | 0.051    |                              |
| Penn class                                    | Penn class A             | 7            | 88 (14.1)    |                       |          | 0.0036                       |
|                                               | Penn class B             |              | 31 (15.7)    | 1.18 (0.78–1.78)      | 0.43     |                              |
|                                               | Penn class C             |              | 13 (15.3)    | 1.09 (0.61–1.95)      | 0.78     |                              |
|                                               | Penn class B and C       |              | 7 (18.9)     | 1.63 (0.76–3.53)      | 0.21     |                              |
| CPB time (min)                                | Risk by 30-unit increase | 66           | 131 (14.8)   | 1.02 (0.94–1.10)      | 0.70     | 0.0022                       |

Abbreviations: CI, confidence interval; CKD, chronic kidney disease; COPD, chronic obstructive pulmonary disease; CPB, cardiopulmonary bypass; Hx, history of; TIA, transient ischemic attack.

<sup>a</sup>Adjusted for age, COPD, HxCKD, pericardial tamponade, and DeBakey class 2018–06–18 Analys.sas.
